# Supplementary material for: Steering N/S coordination number to accelerate catecholase-like catalysis over low-coordinated Cu site
Source: PubMed Central journal article supplement — Chem Sci. 2024 Oct 29;15(46):19513–9. doi: 10.1039/d4sc05014b (PMC11575541; doi:10.1039/d4sc05014b), 2024-10-29
Supplement: SC-OLF-D4SC05014B-s001.pdf [file SC-OLF-D4SC05014B-s001.pdf]

## Supporting Information

### Steering N/S coordination number to accelerate catecholase-like catalysis over low-coordinated Cu site

Meng Yuan,<sup>a</sup> Nannan Xia,<sup>b</sup> Ziheng Huang,<sup>a</sup> Chaofeng Huang,<sup>c</sup> Xun Hu,<sup>\*a</sup> Fei He<sup>\*a</sup>

<sup>a</sup> School of Material Science and Engineering, University of Jinan, Jinan 250024, China

<sup>b</sup> State Key Laboratory of Biobased Material and Green Papermaking, Key Laboratory of Pulp & Paper Science and Technology of Shandong Province/Ministry of Education, Qilu University of Technology (Shandong Academy of Sciences), Jinan 250353, China

<sup>c</sup> School of Chemistry and Chemical Engineering/State Key Laboratory Incubation Base for Green Processing of Chemical Engineering, Shihezi University, Shihezi 832000, China

(\*) E-mail: xun.hu@outlook.com; mse\_hef@ujn.edu.cn

### Experimental Section

**Chemicals.** 3-Amino-5-thiol-1,2,4-triazole (ATT, 98%) and 3-thiol-1,2,4-triazole (TT, 97%) was purchased from Macklin. 3,5-di-tert-butylcatechol (3,5-DTBC, 98%) and 3,5-di-tert-butylbenzoquinone, (3,5-DTBQ, 98%) were purchased from Energy Chemical (Shanghai, China) and Bidepharm, respectively. CuSO<sub>4</sub> was purchased from DAMAO. Ultrapure water was obtained using a Taiping-M pure water purification system (China). All solvents were of analytical grade and used without further purification.

**Preparation of ATT-Cu:** 2.0 g 3-amino-5-thiol-1,2,4-triazole (ATT) in 125 mL DMF was added in the CuSO<sub>4</sub> aqueous solution (1.36 g CuSO<sub>4</sub> in 250 mL H<sub>2</sub>O). After stirred for 24h at room temperature, the mixture was centrifuged, rinsed with H<sub>2</sub>O, ethanol and diethyl ether successively. The resulting product was further dried at 100 °C under vacuum to yield ATT-Cu (0.66 g).

**Preparation of TT-Cu:** 2.0 g 3-thiol-1,2,4-triazole (TT) in 125 mL H<sub>2</sub>O was added in the CuSO<sub>4</sub> aqueous solution (1.58 g CuSO<sub>4</sub> in 250 mL H<sub>2</sub>O). After stirred for 24h at room temperature, the mixture was centrifuged, rinsed with H<sub>2</sub>O, ethanol and diethyl ether successively. The resulting product and dried at 100 °C under vacuum to yield TT-Cu (0.30 g).

**Evaluation of the catalytic kinetics:** The intrinsic catalytic activity of nanozyme was quantitatively

evaluated based on the kinetics constants, including  $K_m$  (substrate affinity),  $V_{max}$  (maximal reaction rate),  $K_{cat}$  (catalytic rate constant) and  $K_{cat}/K_m$  (catalytic efficiency). These kinetics constants were obtained by non-linear curve fitting of Michaelis–Menten equation, which was given as follow:

$$V = V_{max} \times [S]/(K_m + [S])$$

where  $V$  and  $V_{max}$  represented the initial and maximal reaction velocities, respectively.  $[S]$  was the concentration of substrate.  $K_{cat}$  was obtained according to the equation:  $K_{cat} = V_{max}/[E]$ , where  $[E]$  represented the concentration of nanozyme.

10  $\mu$ L of nanozyme (1 mg mL<sup>-1</sup>) and 1.5~25  $\mu$ L of 3,5-DTBC (50 mM) were added to 500  $\mu$ L of acetonitrile/PBS (pH=8) buffer solution with a volume ratio of 1:5. The characteristic absorption peak at 416 nm attributable to 3,5-DTBQ was monitored over time.

**Evaluation of electron transfer capability of nanozyme:** 1 mg nanozyme, 20  $\mu$ L TCNQ (5 mM) and 980  $\mu$ L acetonitrile was mixed at room temperature. After stirred at 80 °C for 20 min, the suspension was centrifuged to obtain the liquid, which was further monitored using UV-vis spectroscopy.

**Electrochemical measurement:** The electrochemical tests were conducted in a standard three-electrode system using a CHI760E workstation. A rotating disk glassy carbon electrode modified with nanozyme acted as the working electrode. A graphite rod and calomel (saturated KCl) were used as counter and reference electrodes, respectively. The nanozyme dispersed in ethanol (5 mg mL<sup>-1</sup>) was cast on the pre-polished surface of the rotating glassy carbon electrode (RDE, 5 mm diameter) or the rotating ring-disk electrode (RRDE, 5.61 mm diameter). After dried at RT, 10  $\mu$ L of Nafion (0.05 wt %) was further cast on the surface of the electrode. For ORR investigation, the electrolyte was the PBS solution (pH=8.0). When testing the catalytic oxidation of 3,5-DTBC, the PBS (pH=8.0)/CH<sub>3</sub>CN solution with a volume ratio of 5:1 was saturated by Ar or O<sub>2</sub> and the concentration of 3,5-DTBC was 1 mM.

According to the linear sweep voltammetry (LSV) of RRDE measurement at 1600 rpm, the H<sub>2</sub>O<sub>2</sub> yields and the electron transfer number ( $n$ ) were calculated based on the following equation<sup>[1]</sup>:

$$H_2O_2 (\%) = 200 \times \frac{I_R/N_0}{(I_R/N_0) + I_D}$$

$$n = 4 \times \frac{I_D}{(I_R/N_0) + I_D}$$

where  $I_D$  and  $I_R$  represented the disk current and ring current, respectively. The  $N_0$  represented the

current collection efficiency of RRDE, which was determined to be 0.29.

**Calculation of d-band center:** The detail to calculate the d-band center is given as the following equation<sup>[2]</sup>.

$$d\text{-band center} = \frac{\int N(\varepsilon)\varepsilon d\varepsilon}{\int N(\varepsilon)d\varepsilon}$$

where  $N(\varepsilon)$  represents the density of states or the XPS-intensity in our work and  $\varepsilon$  represents the binding energy.

**Evaluation of redox constant ( $k_s$ ):** The  $k_s$  value was obtained according to the following Laviron equation<sup>[3]</sup>:

$$E_c = E_{1/2} - \frac{RT}{\alpha nF} \times \ln \left( \frac{\alpha nF}{RTk_s} \right) - \frac{RT}{\alpha nF} \times \ln v$$

where  $E_c$  and  $E_{1/2}$  represented the reduction and the formal potential of 3, 5-DTBC, respectively.  $R$  and  $T$  corresponded to the universal gas constant and the kelvin temperature, respectively.  $n$  was the number of electrons transferred for oxidation of 3, 5-DTBC, which was equal to 2.  $\alpha$  and  $k_s$  were the transfer coefficient and the kinetic constant of 3, 5-DTBC, respectively.  $v$  was the scan rate in the CV measurement.

## Characterizations

Nitrogen adsorption/desorption test was performed at 77 K using Quantachrome NOVA 1200e (USA) instrument. Before testing, ATT-Cu and TT-Cu were treated via vacuum degassing for 6h at 120°C. Contact angle was tested on a JC2000D1 instrument (China). X-ray photoelectron spectroscopy (XPS) spectra was conducted on a Thermo Scientific K-Alpha (USA) with  $h\nu$  1486.6 eV. Ultraviolet photoelectron spectroscopy (UPS) was conducted on a Thermo Fisher Scientific ESCALAB XI+ (USA). Electron spin resonance (ESR) was carried out on Bruker EMXnano (Germany). Transmission electron microscopy (TEM) image was collected on a JEM-2100 Plus microscope (JEOL, Japan). Scanning electron microscopy (SEM) images were recorded on a ZEISS Gemini 300 (Germany) scanning electron microscope at an acceleration voltage of 3 kV. Energy dispersive X-ray spectroscopy was obtained on an OXFORD XPLORE30 at an acceleration voltage of 15 kV. UV-vis absorption spectroscopy was measured on a UV-2600i UV-vis spectrophotometer (Japan).

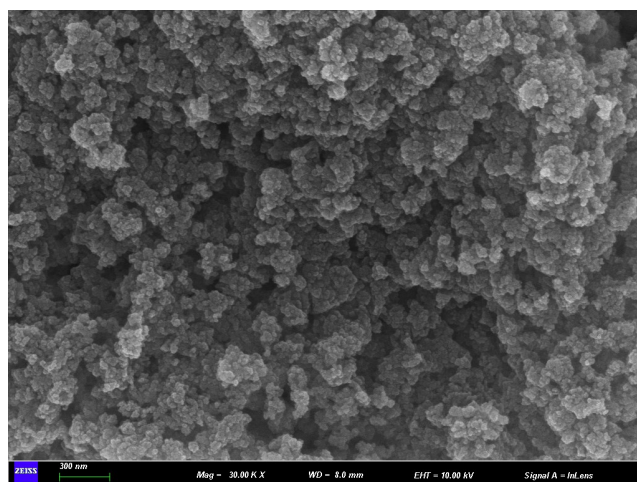

**Figure S1** SEM image of TT-Cu.

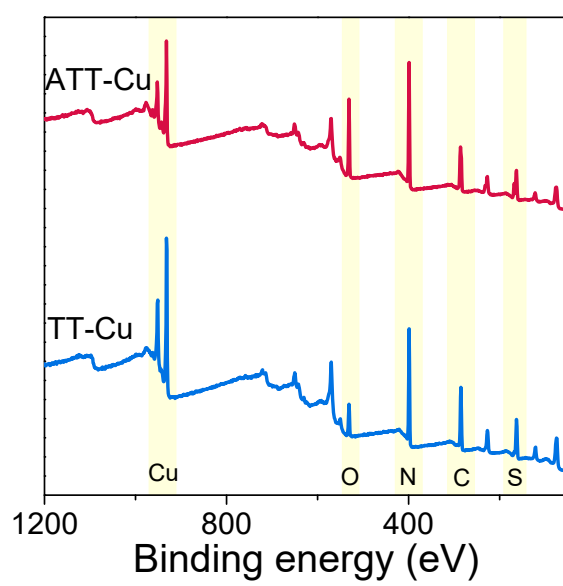

**Figure S2** XPS survey spectra of ATT-Cu and TT-Cu.

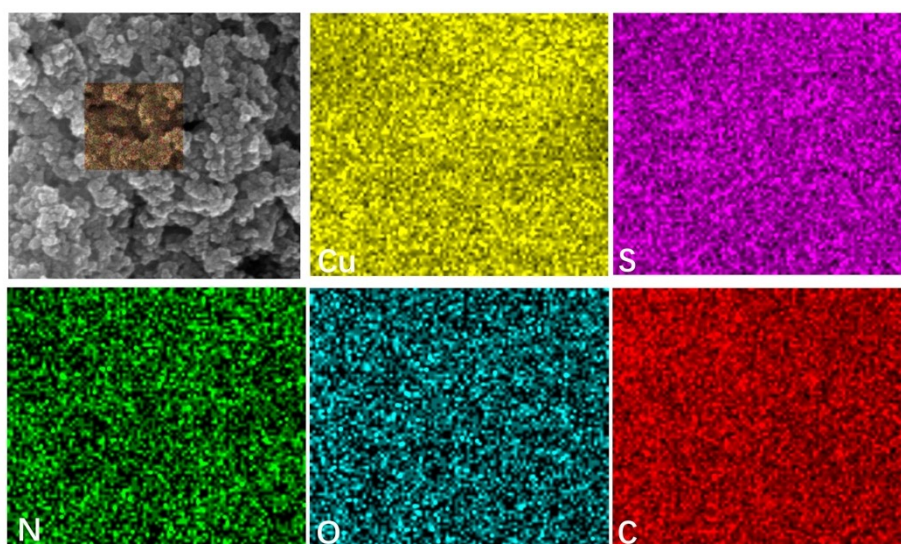

**Figure S3** EDS mapping of TT-Cu.

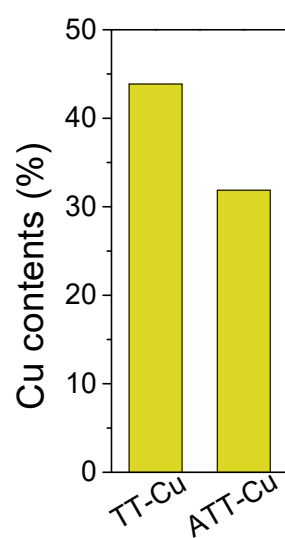

**Figure S4** Cu contents (ICP-OES) of ATT-Cu and TT-Cu.

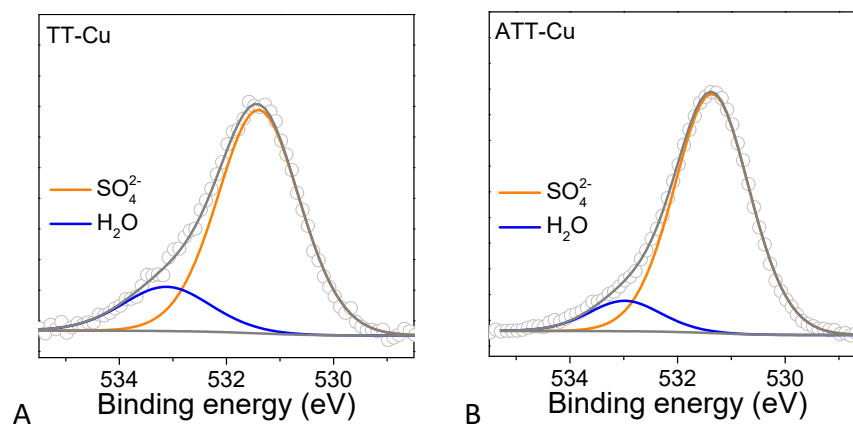

**Figure S5** O1s spectra of ATT-Cu and TT-Cu.

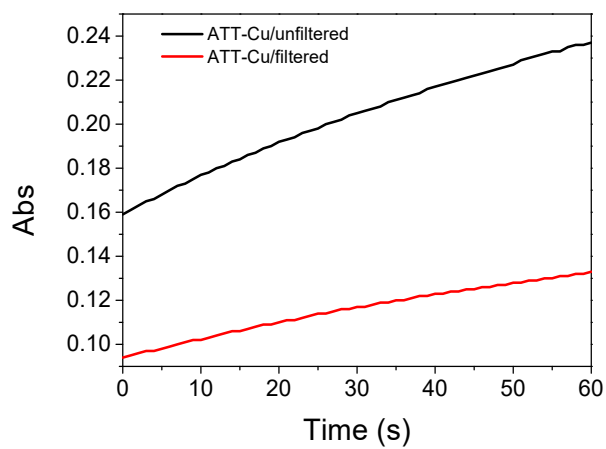

**Figure S6** CO-mimicking activities of ATT-Cu before and after filtering with a membrane (pore size: 100nm).

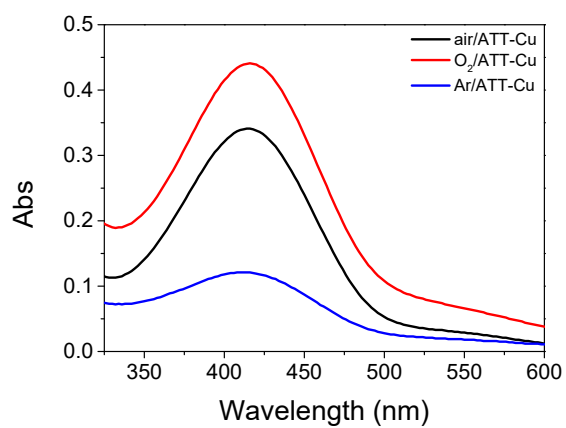

**Figure S7** UV-vis spectra of ATT-Cu-catalyzed oxidation of 3,5-DTBC in Ar, air and O<sub>2</sub>.

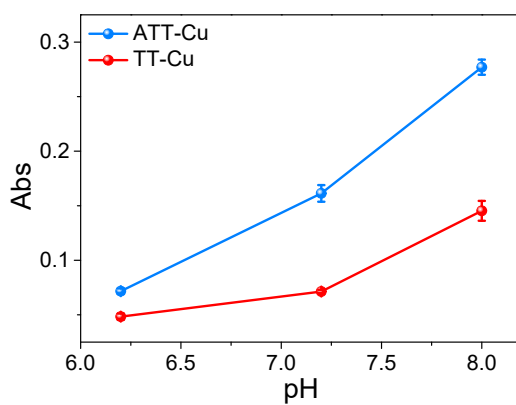

**Figure S8** CO-mimicking activities of ATT-Cu under different pH condition.

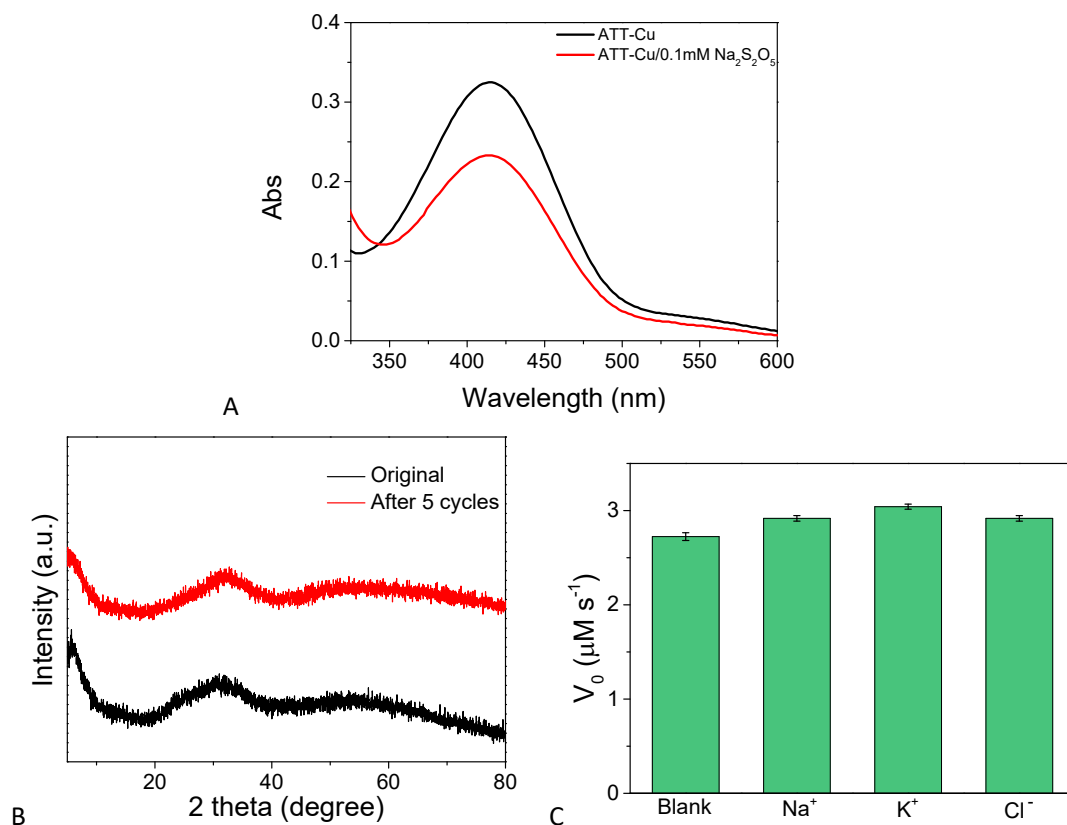

**Figure S9** (A) UV-vis spectra of ATT-Cu-catalyzed oxidation of 3,5-DTBC before and after Na<sub>2</sub>S<sub>2</sub>O<sub>5</sub> inhibiting; (B) XRD patterns of ATT-Cu before and after cycle tests; (C) Anti-interference capabilities of ATT-Cu for K<sup>+</sup>, Na<sup>+</sup> and Cl<sup>-</sup> during mimicking CO-like catalysis.

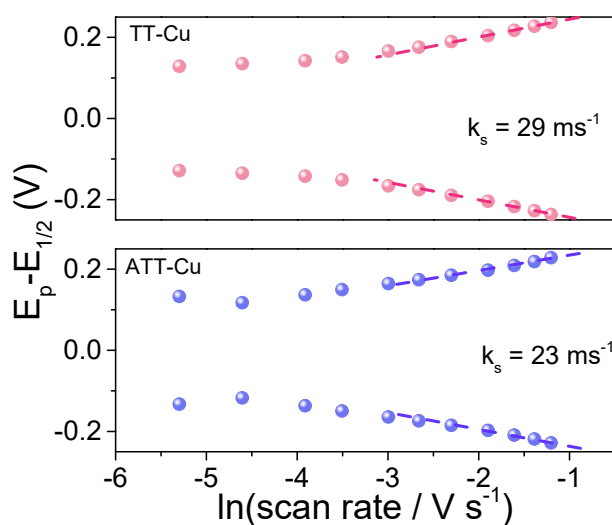

**Figure S10** Plots of the redox peak potentials versus the logarithm of scan rates.

**Table S1** EXAFS fitting parameters at the Cu *K*-edge for ATT-Cu, TT-Cu and Cu foil.

| Sample  | Shell | $CN^a$  | $R(\text{\AA})^b$ | $\sigma^2(\text{\AA}^2)^c$ | $\Delta E_0(\text{eV})^d$ | <i>R</i> factor |
|---------|-------|---------|-------------------|----------------------------|---------------------------|-----------------|
| Cu-foil | Cu-Cu | 12*     | 2.54±0.01         | 0.0083±0.0005              | 3.9±0.6                   | 0.0033          |
| TT-Cu   | Cu-N  | 1.2±0.2 | 1.88±0.01         | 0.0103±0.0020              | -3.1±0.4                  | 0.0047          |
|         | Cu-S  | 2.5±0.4 | 2.22±0.01         |                            |                           |                 |
| ATT-Cu  | Cu-N  | 2.0±0.3 | 1.93±0.01         | 0.0005±0.0022              | 2.0±0.6                   | 0.0145          |
|         | Cu-S  | 0.5±0.1 | 2.29±0.01         |                            |                           |                 |

<sup>a</sup>*CN*, coordination number; <sup>b</sup>*R*, the distance to the neighboring atom; <sup>c</sup> $\sigma^2$ , Debye-Waller factor, the Mean Square Relative Displacement (MSRD); <sup>d</sup> $\Delta E_0$ , inner potential correction; *R* factor indicates the goodness of the fit.  $S_0^2$  was fixed to 0.809, according to the experimental EXAFS fit of Cu foil by fixing *CN* as the known crystallographic value. \* This value was fixed during EXAFS fitting, based on the known structure of Cu. Fitting range:  $3.0 \leq k (\text{\AA}^{-1}) \leq 12.0$  and  $1.0 \leq R (\text{\AA}) \leq 2.8$  (Cu foil);  $2.0 \leq k (\text{\AA}^{-1}) \leq 10.5$  and  $1.0 \leq R (\text{\AA}) \leq 2.2$  (Cu-TT);  $2.0 \leq k (\text{\AA}^{-1}) \leq 10.5$  and  $1.0 \leq R (\text{\AA}) \leq 2.2$  (Cu-ATT). A reasonable range of EXAFS fitting parameters:  $0.700 < S_0^2 < 1.000$ ;  $CN > 0$ ;  $\sigma^2 > 0 \text{ \AA}^2$ ;  $|\Delta E_0| < 15 \text{ eV}$ ; *R* factor < 0.02.

**Table S2** Comparison of CO-mimicking activities between ATT-Cu and other reported artificial enzymes

| Species                     | $K_m(\mu\text{M})$ | $K_{\text{cat}}(\text{s}^{-1})$ | $K_{\text{cat}}/K_m(\text{mM}^{-1}\text{s}^{-1})$ | Ref.      |
|-----------------------------|--------------------|---------------------------------|---------------------------------------------------|-----------|
| Cu-P1                       | 380                | $8.23 \times 10^{-6}$           | $3.578 \times 10^{-5}$                            | [4]       |
| Cu-P2                       | 230                | $1.44 \times 10^{-5}$           | $6.231 \times 10^{-5}$                            | [4]       |
| Cu-P3                       | 800                | $2.03 \times 10^{-5}$           | $2.538 \times 10^{-5}$                            | [4]       |
| Cu-P4                       | 960                | $1.93 \times 10^{-5}$           | $2.01 \times 10^{-5}$                             | [4]       |
| Cu-P5                       | 910                | $2.18 \times 10^{-5}$           | $2.34 \times 10^{-5}$                             | [4]       |
| Cu-GMADPA                   | 220                | $3.23 \times 10^{-6}$           | $1.468 \times 10^{-5}$                            | [4]       |
| MOF-808-L-His-Cu            | 2210               | 0.0069                          | 0.00312                                           | [5]       |
| CeO <sub>2</sub>            | 1262               | $6.28 \times 10^{-4}$           | $4.98 \times 10^{-4}$                             | [6]       |
| PtNPs                       | 1818               | 0.0184                          | 0.0101                                            | [6]       |
| MOF-818                     | 810                | 0.0384                          | 0.0474                                            | [6]       |
| CA-Cu                       | 2240               | 0.364                           | 0.1625                                            | [7]       |
| Fmoc-K/GMP/Cu <sup>2+</sup> | 453                | 1.196                           | 2.4247                                            | [8]       |
| DT-Cu                       | 152                | 0.114                           | 0.749                                             | [9]       |
| Ce-MOF-818                  | 2589               | 1.25                            | 0.482                                             | [10]      |
| Zr-MOF-818                  | 2054               | 0.8                             | 0.391                                             | [10]      |
| Ce-MOF-808                  | 2453               | 0.24                            | 0.0959                                            | [10]      |
| MOF-808-His-Cu              | 85.07              | 0.04679                         | 0.55                                              | [11]      |
| ATT-Cu                      | 499.6              | 0.03362                         | 0.0673                                            | this work |

## References

- [1] F. He, L. Mi, Y. Shen, X. Chen, Y. Yang, H. Mei, S. Liu, T. Mori, Y. Zhang, *J. Mater. Chem. A* **2017**, 5, 17413-17420.
- [2] S. J. Hwang, S. K. Kim, J. G. Lee, S. C. Lee, J. H. Jang, P. Kim, T. H. Lim, Y. E. Sung, S. J. Yoo, *J. Am. Chem. Soc.* **2012**, 134, 19508-19511.
- [3] P. Ei Phyu Win, J. Yang, S. Ning, X. Huang, G. Fu, Q. Sun, X. H. Xia, J. Wang, *Proc. Natl. Acad. Sci. U. S. A.* **2024**, 121, e2316553121.

- [4] S. Thanneeru, N. Milazzo, A. Lopes, Z. Wei, A. M. Angeles-Boza, J. He, *J. Am. Chem. Soc.* **2019**, *141*, 4252-4256.
- [5] M. Sha, L. Rao, W. Xu, Y. Qin, R. Su, Y. Wu, Q. Fang, H. Wang, X. Cui, L. Zheng, *Nano Lett.* **2023**, *23*, 701-709.
- [6] M. Li, J. Chen, W. Wu, Y. Fang, S. Dong, *J. Am. Chem. Soc.* **2020**, *142*, 15569-15574.
- [7] J. Wang, R. Huang, W. Qi, R. Su, Z. He, *Chem. Eng. J.* **2022**, *434*, 134677.
- [8] S. Xu, H. Wu, S. Liu, P. Du, H. Wang, H. Yang, W. Xu, S. Chen, L. Song, J. Li, *Nat. Commun.* **2023**, *14*, 4040.
- [9] M. Yuan, K. Han, H. Yang, L. Mi, C. Huang, X. Hu, F. He, *Small* **2024**, e2401756.
- [10] S. Liu, Y. He, W. Zhang, T. Fu, L. Wang, Y. Zhang, Y. Xu, H. Sun, H. Zhao, *Small* **2024**, *20*, e2306522.
- [11] R. V. Morajkar, A. P. Fatrekar, A. A. Vernekar, *Chem. Sci.* **2024**, doi: 10.1039/D4SC02136C.
